# Supplementary material
Source: PubMed Central journal article supplement (PMC3547591)
Supplement: NIHMS426714-supplement-Supplementary_Material.pdf [file NIHMS426714-supplement-Supplementary_Material.pdf]

Supplementary Material

Figures

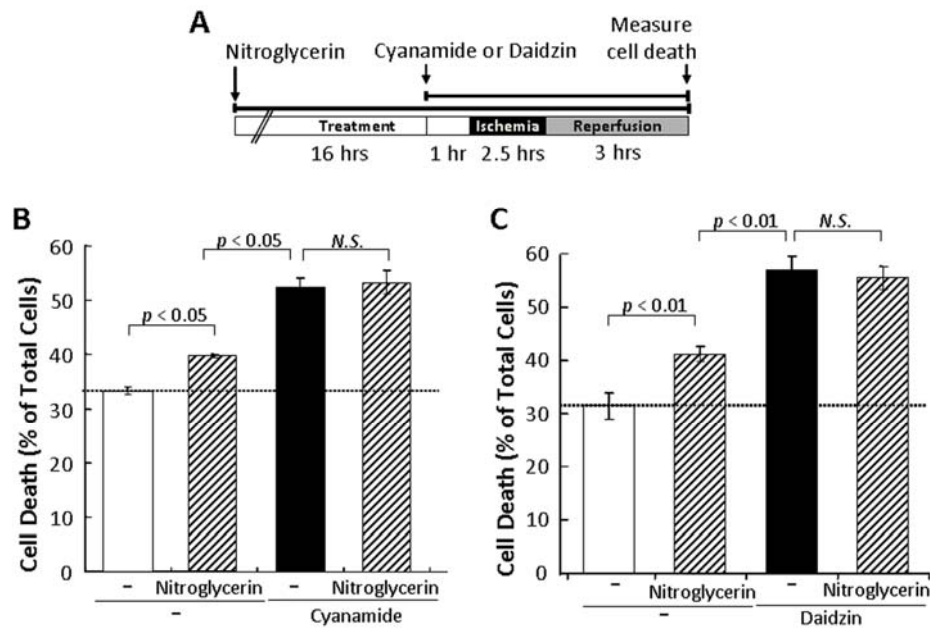

**Fig. S1. Nitroglycerin did not induce increased cardiomyocyte death in the presence of an ALDH2 inhibitor, after hypoxia-reoxygenation, in culture.** (A) Experiment protocol for ischemia-reoxygenation in cultured cardiomyocytes. (B) 16 hours of continuous treatment with nitroglycerin (100  $\mu$ M) increased cardiomyocyte death after 2.5 hours of hypoxia and 3 hours of reoxygenation, in culture ( $p < 0.05$  vs. control). No increase in cell death was observed by the same nitroglycerin treatment after hypoxia-reoxygenation, when ALDH2 was inhibited by the ALDH2 inhibitor cyanamide (5mM, for 1 hour prior to hypoxia-reoxygenation) (*N.S.*; non significant difference compared with the group treated with cyanamide alone). Data are mean $\pm$ SEM (n=3). (C) Similar results to these with cyanamide

were found with another ALDH2-selective inhibitor, daidzin (1 $\mu$ M, for 1 hour prior to hypoxia-reoxygenation) (*N.S.*; non significant difference compared with the group treated with daidzin alone). Data are mean $\pm$ SEM (n=8).

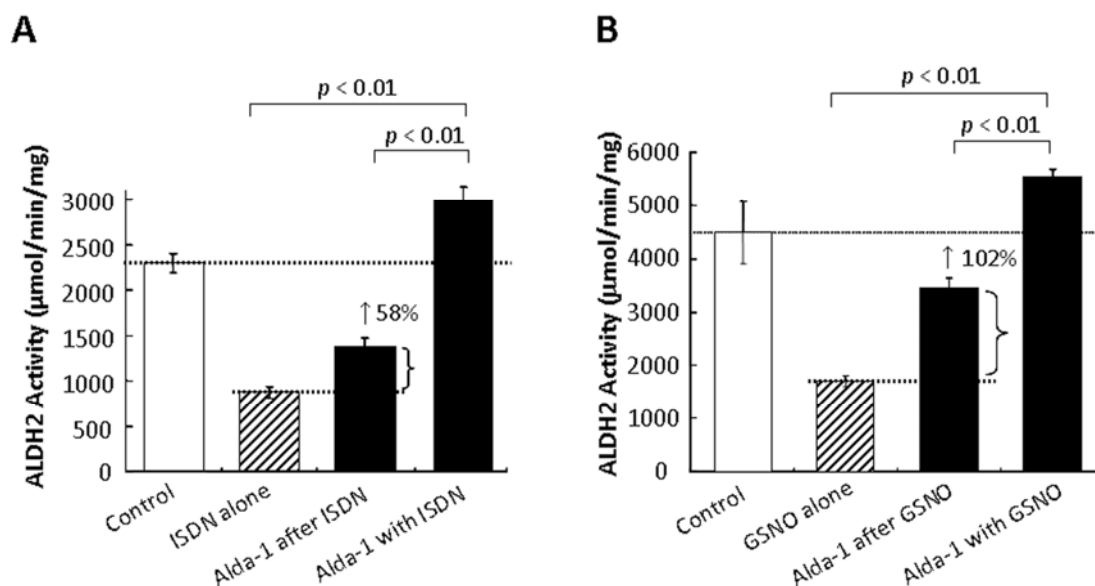

**Fig. S2. Alda-1 prevented inactivation of ALDH2 caused by ISDN and GSNO, *in vitro*.**

(A) The effect of ISDN (protocol as in Fig. 1A). Treatment with ISDN (50  $\mu$ M) for one hour inhibited ALDH2 activity by 59 $\pm$ 3% ( $p < 0.01$ ) and subsequent Alda-1 (20  $\mu$ M) treatment increased ALDH2 activity by 58 $\pm$ 7% ( $p < 0.01$ ). Co-treatment with Alda-1 blocked ISDN-induced inactivation of ALDH2. Data are mean $\pm$ SEM (n=3-6). (B) One-hour treatment with GSNO (40  $\mu$ M; protocol as in Fig. 1A) inhibited ALDH2 activity by 49 $\pm$ 6% ( $p < 0.01$ ). Subsequent addition of Alda-1 (20  $\mu$ M) increased ALDH2 activity by 2 fold. In contrast, co-incubation of Alda-1 completely prevented GSNO-induced ALDH2 inactivation ( $p < 0.01$  vs. the group treated with GSNO alone). Data are mean $\pm$ SEM (n=3).

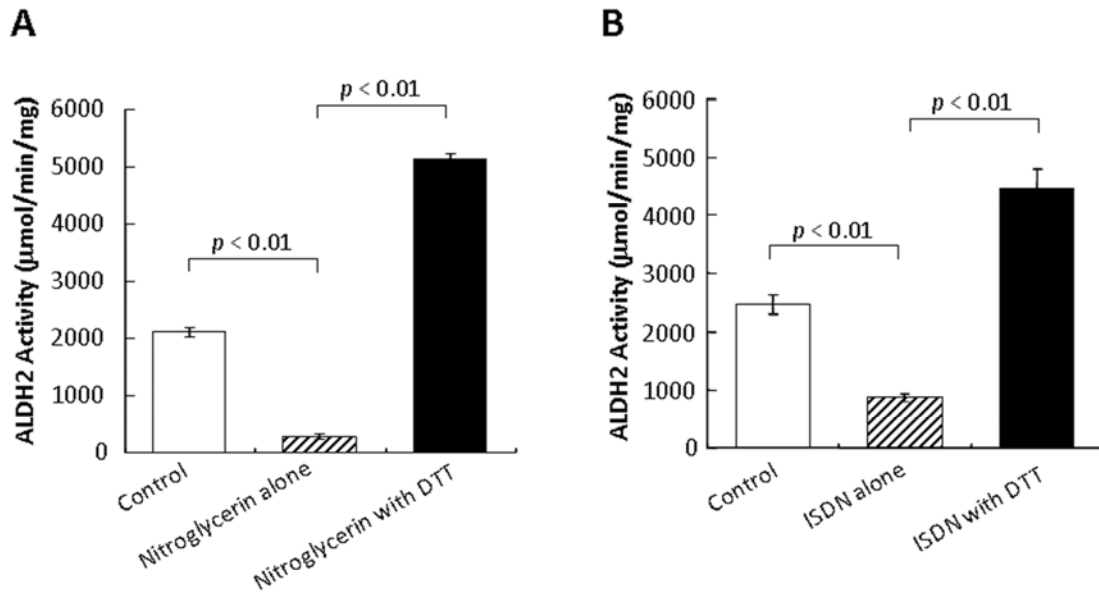

**Fig. S3. DTT prevented inactivation of ALDH2 induced by nitroglycerin and ISDN, *in vitro*.** (A) The effect of the reducing agent DTT on nitroglycerin-induced ALDH2 inactivation was determined (protocol as in **Fig. 1A**). Treatment with nitroglycerin (1 µM) for one hour inhibited ALDH2 activity by over 85%. DTT alone increases the catalytic activity of ALDH by 2.5 fold. Co-treatment of nitroglycerin with DTT prevented nitroglycerin-induced inactivation of ALDH2, bringing ALDH2 activity to levels similar to ALDH2 with DTT alone. (Data are mean±SEM (n=3)). (B) One-hour treatment with ISDN (50 µM; protocol as in **Fig. 1A**) significantly inhibited the ALDH2 activity; the inhibition was prevented by co-incubation with ISDN and DTT. Data are mean±SEM (n=3).

## Tables

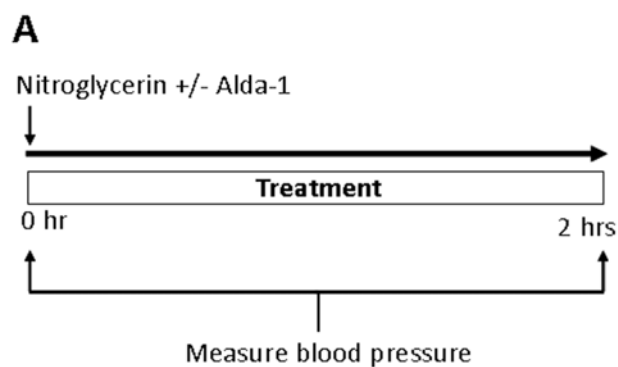

## B

| Time Point                     | N | Heart Rate | Systolic Pressure | Diastolic Pressure |
|--------------------------------|---|------------|-------------------|--------------------|
| Before NTG +/-Alda-1 Treatment |   | 387 ± 8    | 108 ± 4           | 69 ± 5             |
| Nitroglycerin                  | 8 | 392 ± 7    | 89 ± 1*           | 48 ± 3*            |
| Nitroglycerin + Alda-1         |   | 377 ± 8    | 82 ± 2*           | 46 ± 2*            |

**Table S1. Acute treatment with nitroglycerin decreased blood pressure.** (A) Protocol for acute treatment and blood pressure measurement. (B) Blood pressure and heart rate were measured before treatment and after 2 hours of nitroglycerin treatment (7.2 mg/kg/day) with or without Alda-1 (16 mg/kg/day) in rats. Systolic and diastolic blood pressures were decreased after 2 hours of treatment with nitroglycerin alone or with nitroglycerin and Alda-1, compared to those before treatment. Heart rate remained unchanged in all treatment groups. \*  $p < 0.01$  vs. Before Treatment. Data are mean ± SEM (n=8).

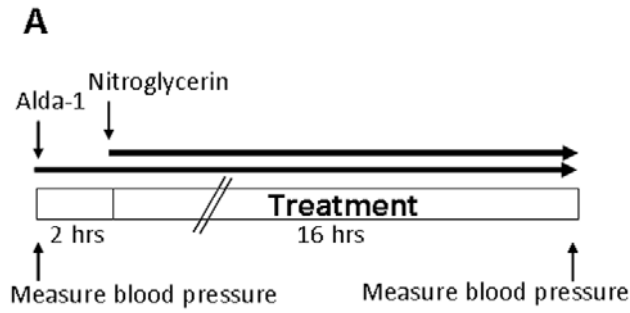

**B**

| Treatment Group      | N | Before Treatment       |                          |                           | After Treatment        |                          |                           |
|----------------------|---|------------------------|--------------------------|---------------------------|------------------------|--------------------------|---------------------------|
|                      |   | Heart Rate (beats/min) | Systolic Pressure (mmHg) | Diastolic Pressure (mmHg) | Heart Rate (beats/min) | Systolic Pressure (mmHg) | Diastolic Pressure (mmHg) |
| Control              | 6 | 398 ± 11               | 110 ± 6                  | 73 ± 7                    | 388 ± 22               | 107 ± 5                  | 75 ± 8                    |
| Alda-1               | 6 | 409 ± 9                | 113 ± 6                  | 82 ± 7                    | 401 ± 15               | 111 ± 9                  | 74 ± 4                    |
| Nitroglycerin        | 8 | 405 ± 8                | 106 ± 3                  | 75 ± 4                    | 398 ± 5                | 113 ± 4                  | 70 ± 5                    |
| Nitroglycerin+Alda-1 | 7 | 401 ± 7                | 118 ± 4                  | 77 ± 2                    | 399 ± 5                | 117 ± 5                  | 75 ± 3                    |

**Table S2. Sustained treatment with nitroglycerin did not affect blood pressure. (A)**

Protocol for sustained treatment and blood pressure measurement. **(B)** Blood pressure and heart rate were measured before and after sustained treatment with nitroglycerin (7.2 mg/kg/day) and/or Alda-1 (16 mg/kg/day). Systolic and diastolic blood pressures remained unchanged before and after nitroglycerin treatment with or without Alda-1, compared to the control. Heart rate remained unchanged in all treatment groups. Data are mean±SEM (n=4-8).

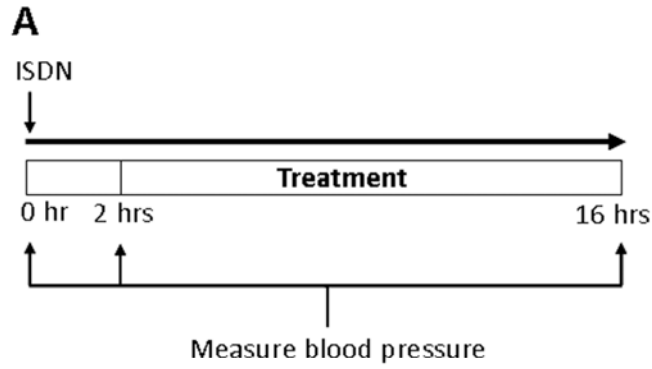

**B**

| Time Point       | N | Heart Rate | Systolic Pressure | Diastolic Pressure |
|------------------|---|------------|-------------------|--------------------|
| Before Treatment | 6 | 389 ± 6    | 118 ± 3           | 78 ± 2             |
| ISDN (2 hrs)     |   | 389 ± 7    | 90 ± 3*           | 46 ± 3*            |
| ISDN (16 hrs)    |   | 398 ± 5    | 103 ± 1*          | 66 ± 4#            |

**Table S3. Acute and sustained treatment with ISDN decreased blood pressure. (A)**

Protocol for acute treatment and blood pressure measurement with ISDN treatment. **(B)** Blood pressure and heart rate were measured before treatment and after 2 and 16 hours of ISDN treatment (16 mg/kg/day). Systolic and diastolic blood pressures were decreased after 2 and 16 hours of treatment with ISDN, compared to those before treatment. Heart rate remained unchanged in all treatment groups. \*  $p < 0.01$  vs. Before Treatment. #  $p < 0.05$  vs. Before Treatment. Data are mean ± SEM (n=6).
